# Supplementary material for: Pickering emulsion emulsified using novel cellulose nanofibers significantly lowers the lipid release rate and cellular absorption
Source: Royal Society of Chemistry journal article supplement (doi:10.1039/d3fo05219b), 2024-01-01
Supplement: d3fo05219b1.pdf [file d3fo05219b1.pdf]

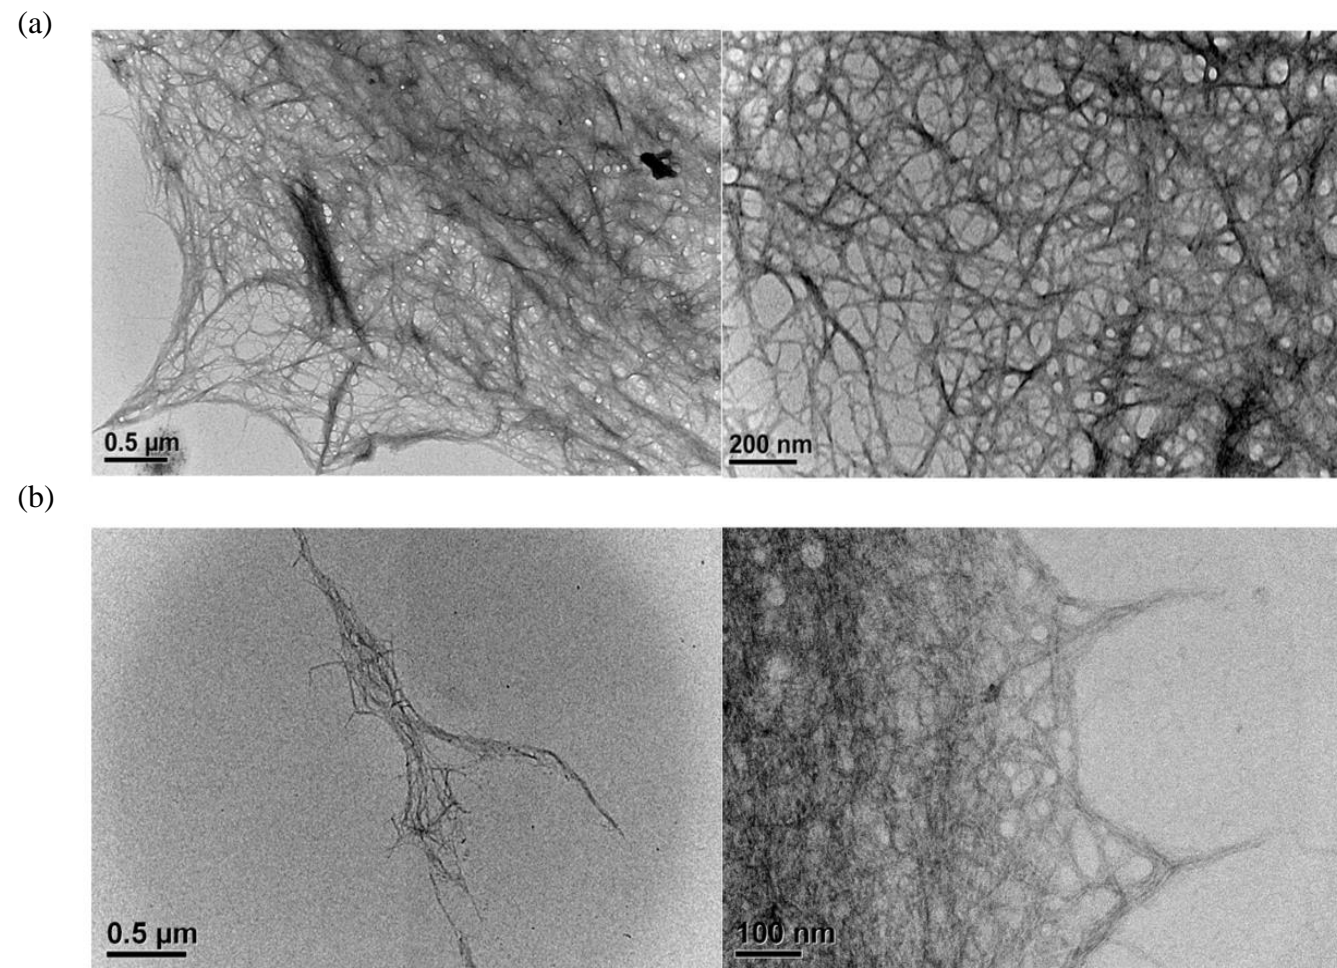

Supplement figure 1. The TEM images of cellular nanofibers.  
(a) no homogenization (b) after 20 minutes ultrasonic homogenization.
